# Supplementary material
Source: PubMed Central journal article supplement (PMC9516781)
Supplement: kiac311_supplementary_data.pdf [file kiac311_supplementary_data.pdf]

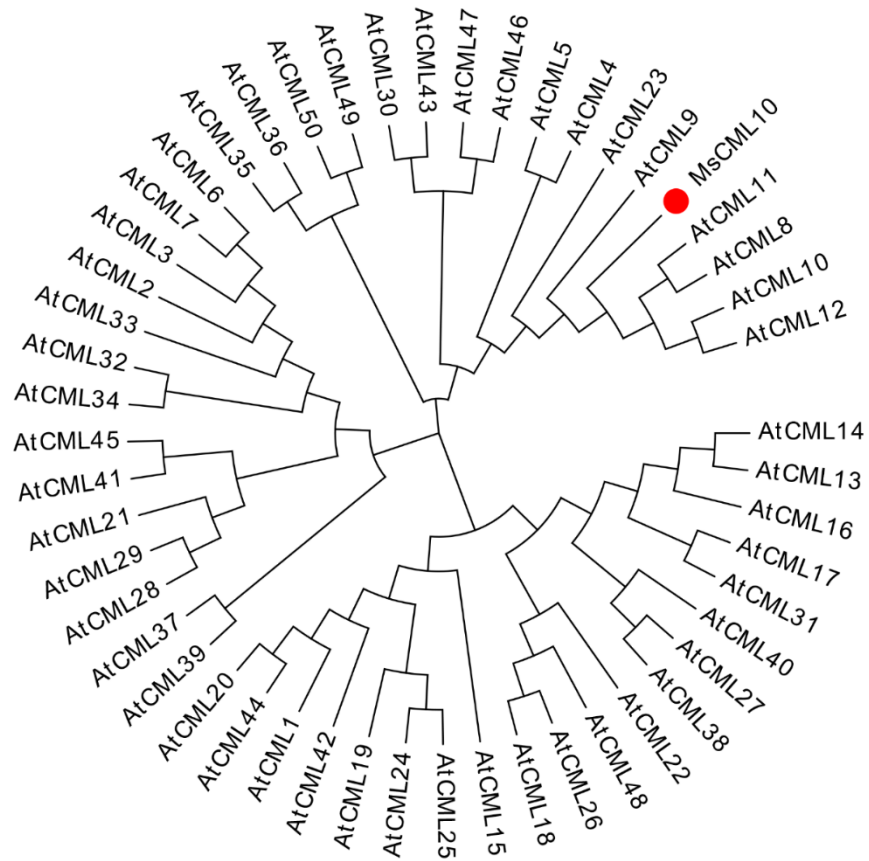

**Supplemental Figure S1** Phylogenetic tree of MsCML10 and fifty AtCMLs. The phylogenetic tree was generated by neighbor joining method using MEGA-X software and the sequences were downloaded from phytozome (<https://phytozome-next.jgi.doe.gov/>).



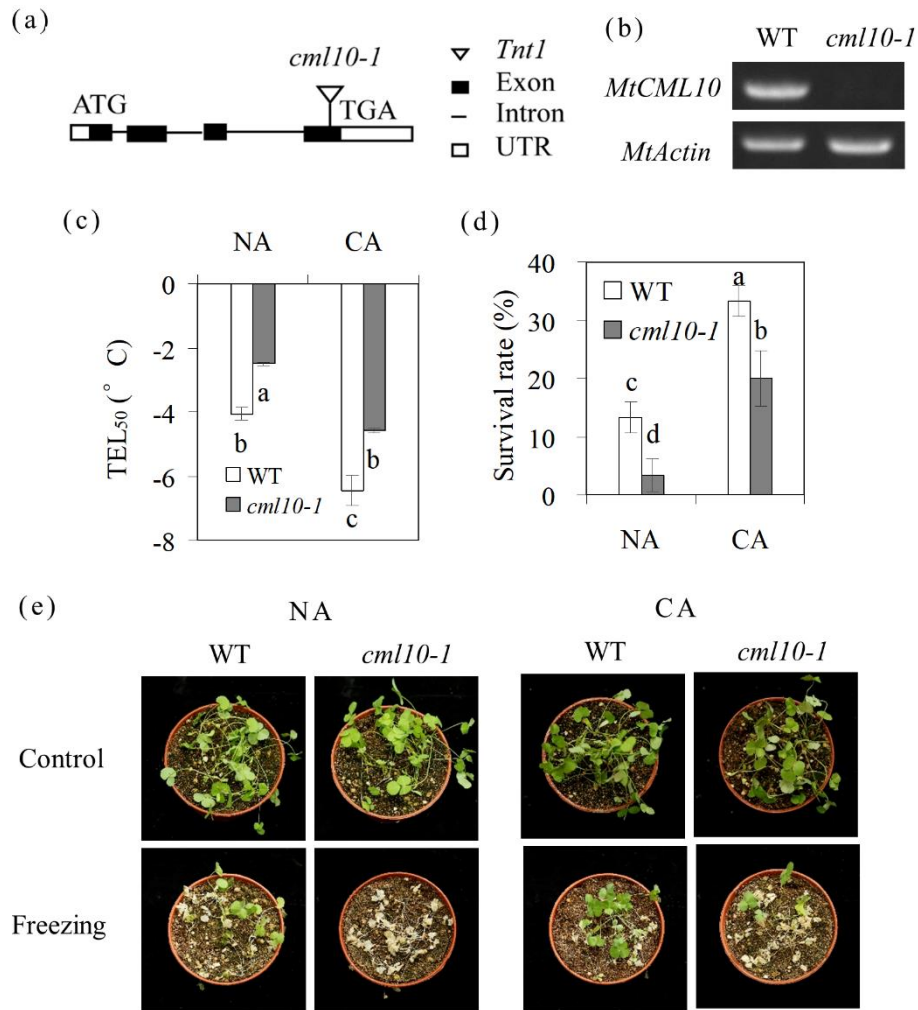

**Supplemental Figure S3** Analysis of cold tolerance in *cml10-1* plants in comparison with the wild type (WT). A schematic diagram showing the insertion position of the *Tnt1* retrotransposon in *cml10-1* (a). Semi-quantitative RT-PCR was used to analyze *MtCML10* transcripts in the *cml10-1* line compared with WT plants (b). The temperature resulted in 50% electrolyte leakage ( $TEL_{50}$ ) in WT and *cml10-1* (c) and survival rate of plants after freezing at -5°C (NA plants) or -7°C (CA plants) for 6 h (d). The freezing-treated plants were photographed after 2 d of recovery at room temperature (e). Means of three replicates and standard errors are presented; the same letter above the column indicates no significant difference at  $P < 0.05$  using Duncan's test.

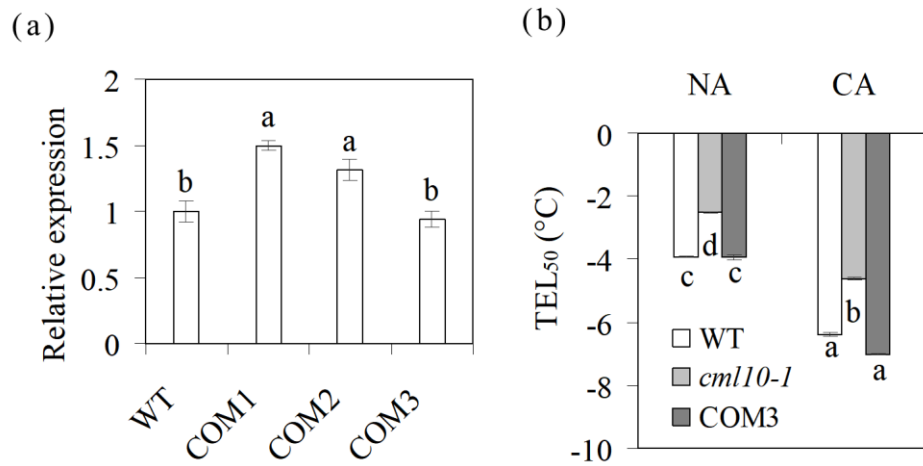

**Supplemental Figure S4** Analysis of the complementary plants as compared with the *cml42* mutant and the wild type (WT). (a) Analysis of *cml10-1* transcript in complementing plants (COM) of *MsCML10* in *cml10-1* mutant and the wild type. (b) The temperature resulted in 50% electrolyte leakage ( $TEL_{50}$ ) in non-acclimated (NA) and cold acclimated (CA) plants. Means of three replicates and standard errors are presented; the same letter above the column indicates no significant difference within each day at  $P < 0.05$  using Duncan's test.

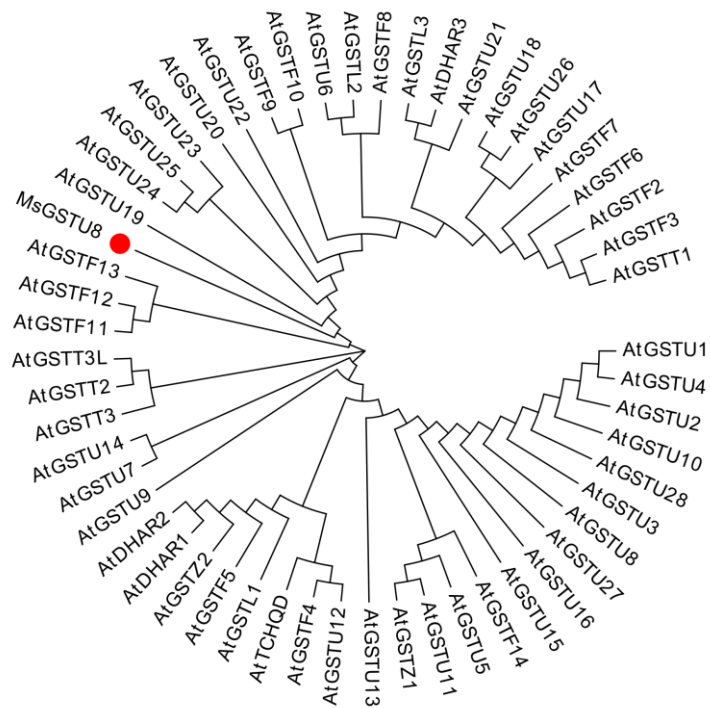

**Supplemental Figure S5** Phylogenetic tree of MsGSTU8 and AtGSTs. The phylogenetic tree was generated by neighbor joining method using MEGA-X software and the sequences were downloaded from phytozome (<https://phytozome-next.jgi.doe.gov/>).

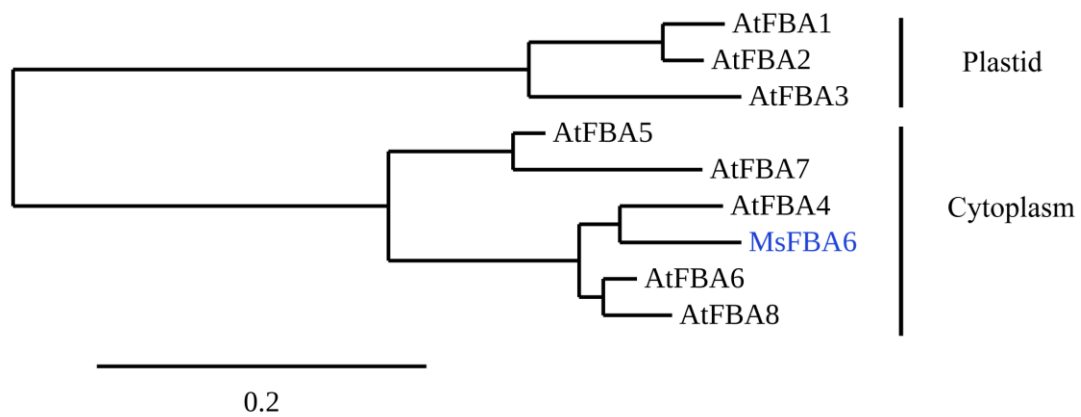

**Supplemental Figure S6** Phylogenetic tree of MsFBA6 and AtFBAs. The phylogenetic tree was generated by neighbor joining method using MEGA-X software and the sequences were downloaded from phytozome (<https://phytozome-next.jgi.doe.gov/>). The bar represents the branch length equivalent to 0.2 amino acid changes per residue.

## Supplemental Data

**Supplemental Table S1** Primer sequences used for RT-qPCR and RT-PCR and the accession numbers of the analyzed genes.

|         | Gene name      | Accession no. | Primer name    | Sequence                      |
|---------|----------------|---------------|----------------|-------------------------------|
| RT-qPCR | <i>MsCML10</i> | OM049783      | Y2230, forward | 5'-CCCACTGAAGAAGAGCTACAAG-3'  |
|         |                |               | Y2231, reverse | 5'-TTTCCTAGCCATCAAGTTCAAGA-3' |
|         | <i>MtCML10</i> | MTR_1g076650  | Y2232, forward | 5'-CCCACTGAAGAAGAGCTACAAG-3'  |
|         |                |               | Y2233, reverse | 5'-TTTCCTAGCCATCAAGTTCAAGA-3' |
|         | <i>MtACTIN</i> | MTR_3g095530  | Y4181, forward | 5'-ATTCACGAGACCACCTAC-3'      |
|         |                |               | Y4182, reverse | 5'-GAGCCACAACCTTAATCTTC-3'    |
| RT-PCR  | <i>MtCML10</i> | MTR_1g076650  | Y4425, forward | 5'-ATGGCACATGTCCTTAGT-3'      |
|         |                |               | Y4426, reverse | 5'-TCATCGAATGGTCATCATC-3'     |
|         | <i>MtACTIN</i> | MTR_3g095530  | Y4181, forward | 5'-ATTCACGAGACCACCTAC-3'      |
|         |                |               | Y4182, reverse | 5'-GAGCCACAACCTTAATCTTC-3'    |
